# Supplementary material for: TRPC7 regulates the electrophysiological functions of embryonic stem cell-derived cardiomyocytes
Source: PubMed Central journal article supplement (PMC8091699; doi:10.1186/s13287-021-02308-7), 2021-05-03
Supplement: 13287_2021_2308_MOESM1_ESM.pdf [file 13287_2021_2308_MOESM1_ESM.pdf]

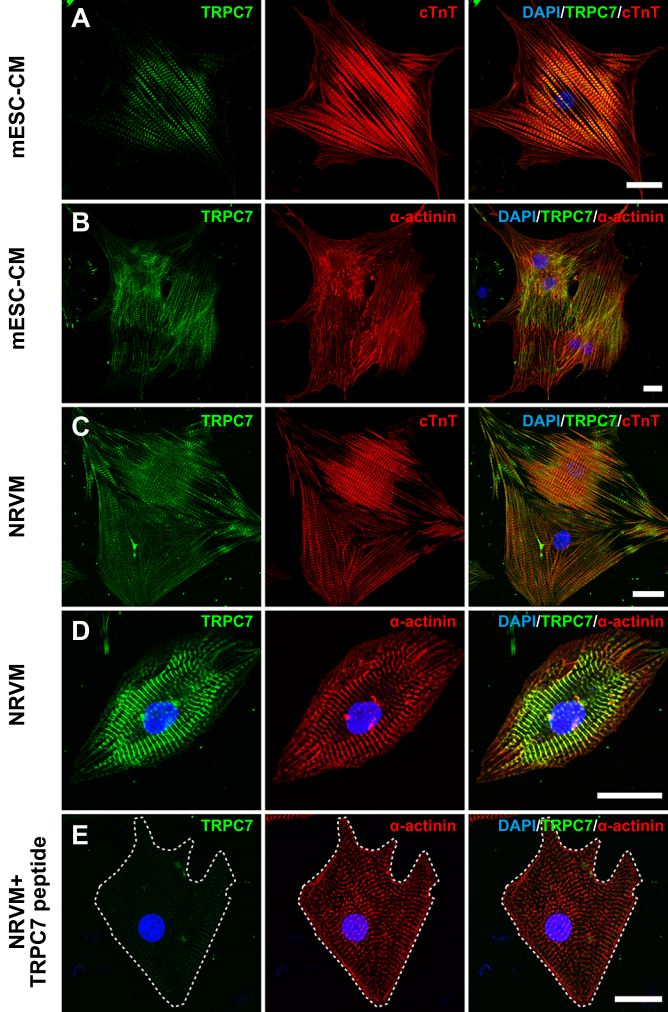

Supplementary figure 1



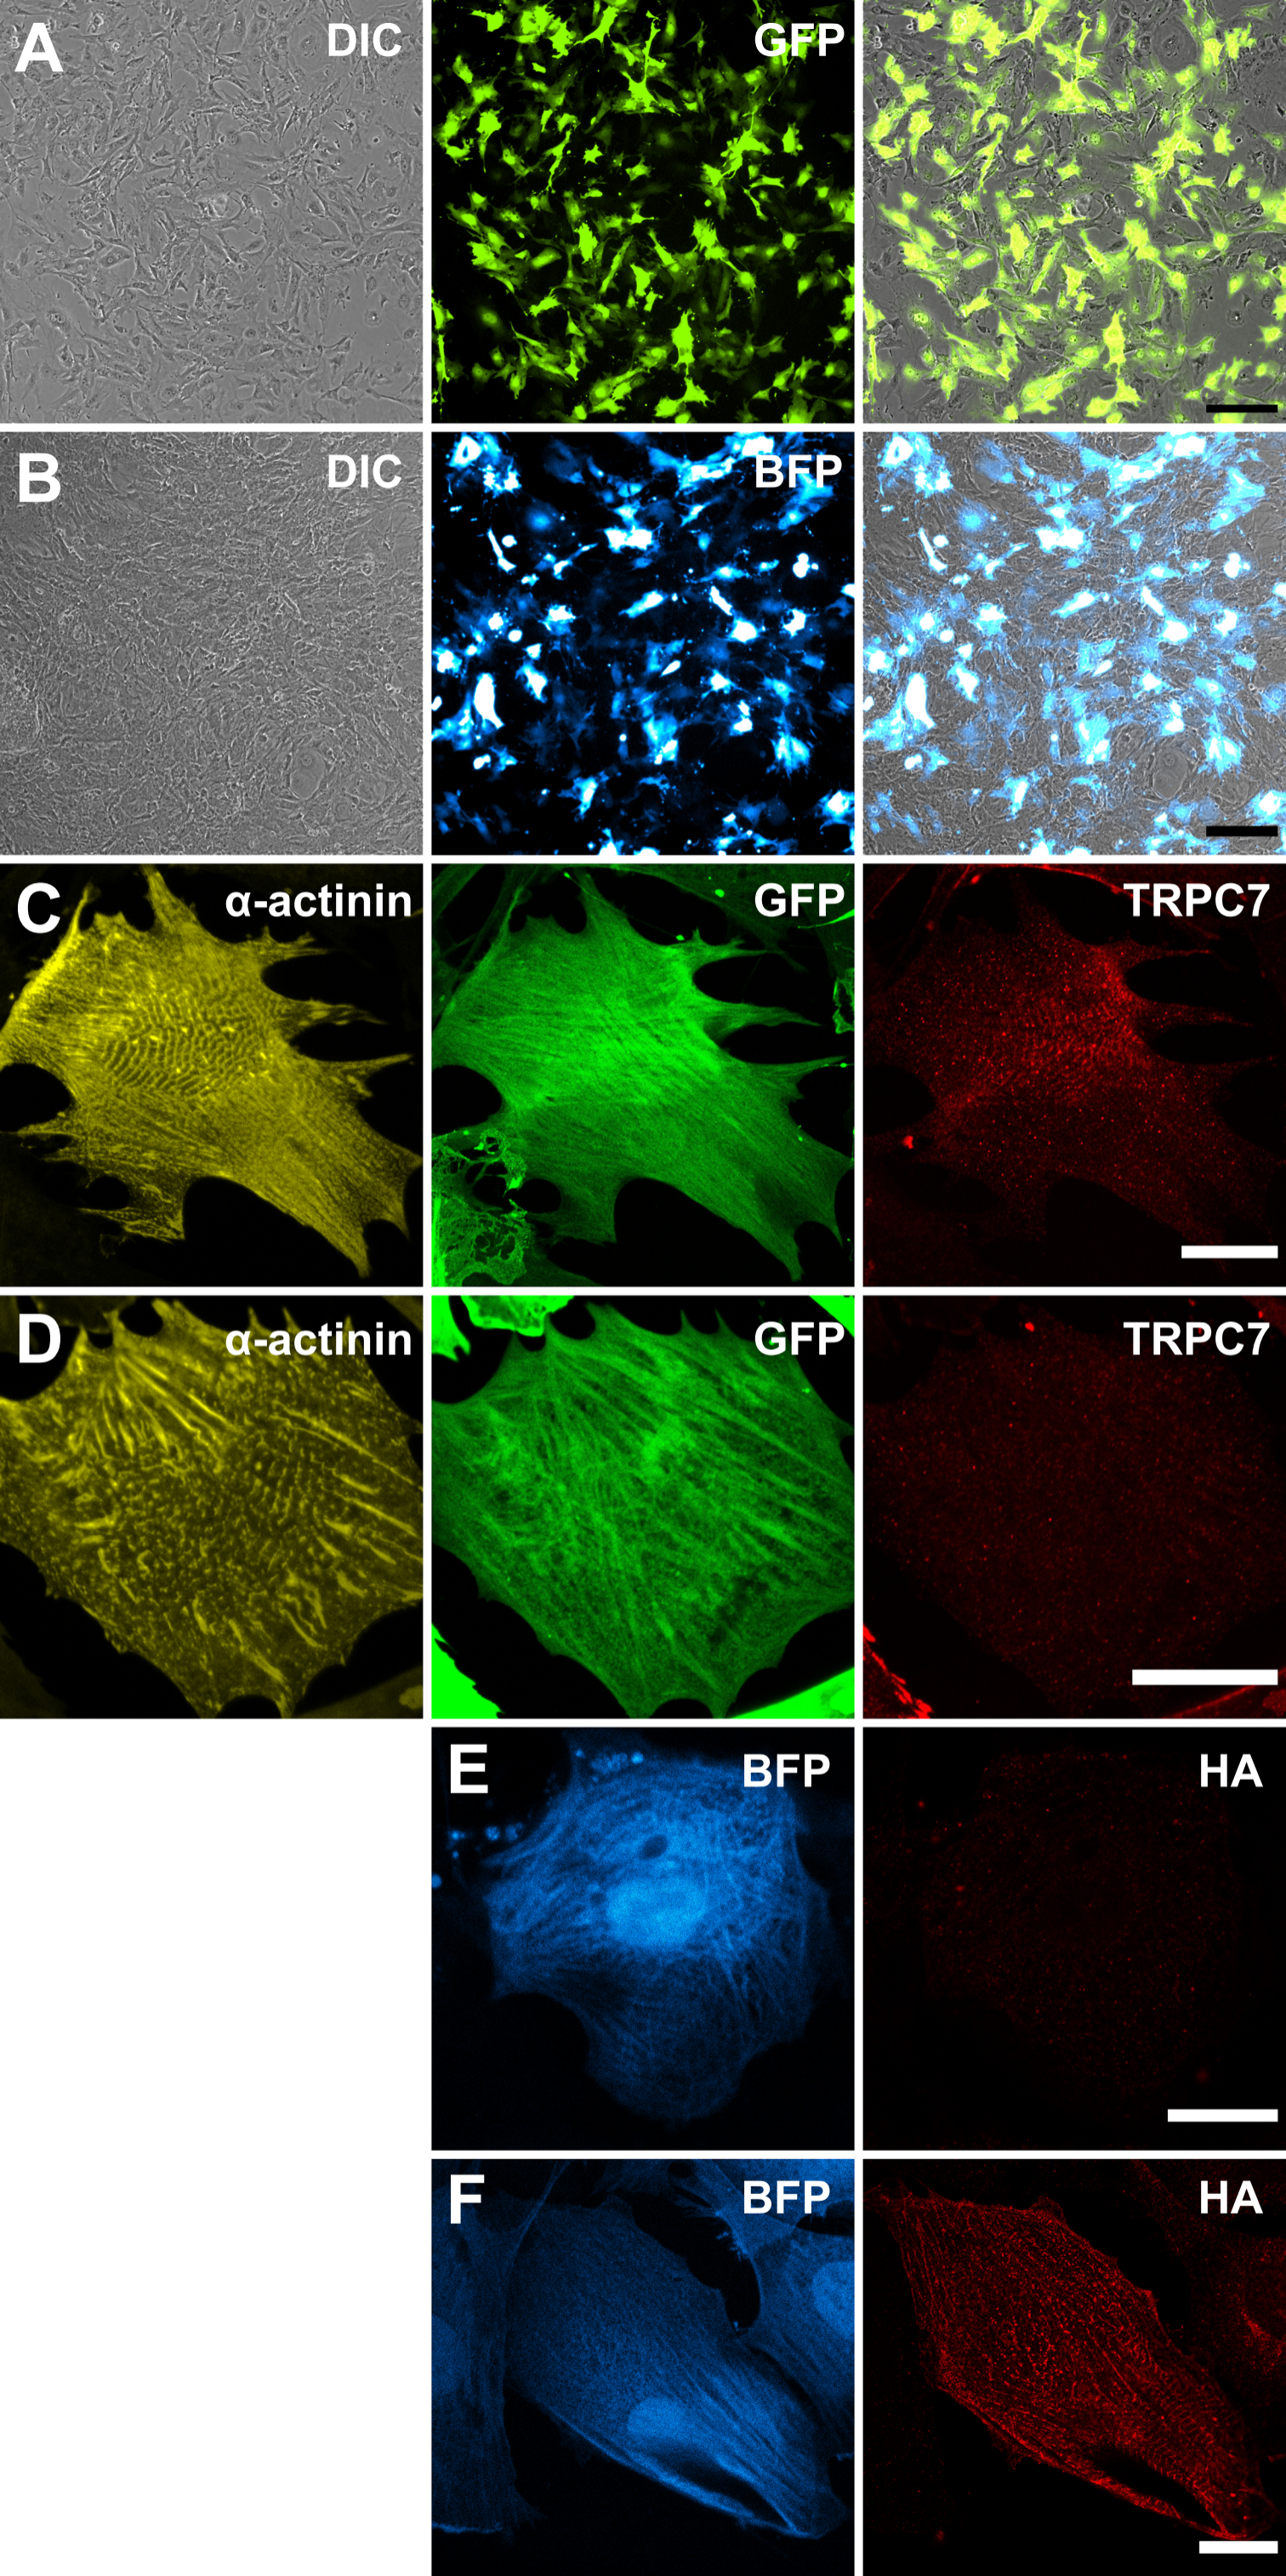



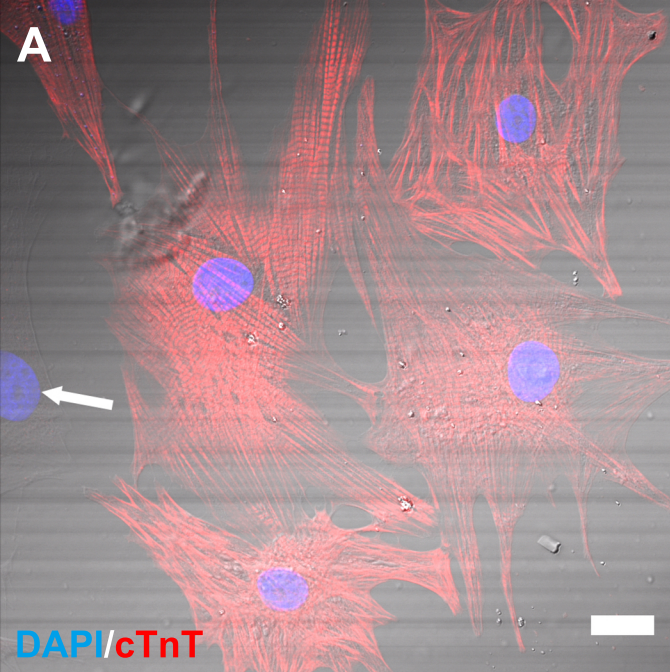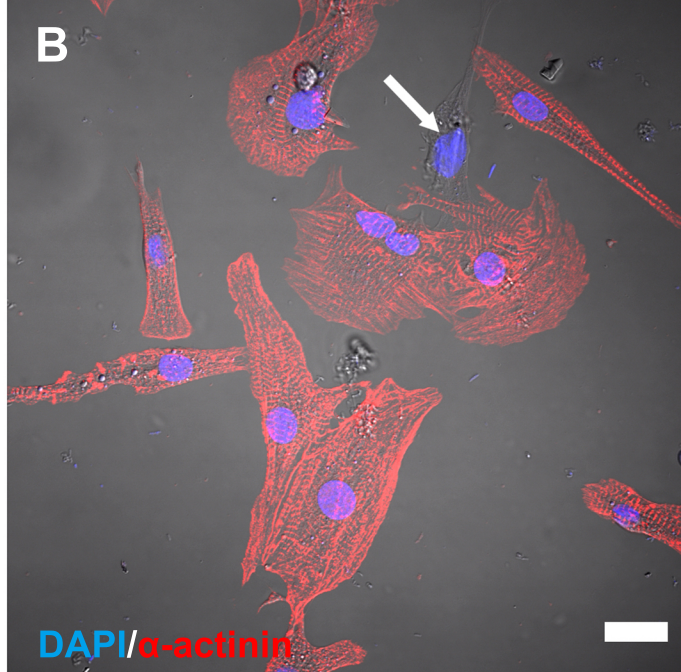

Supplementary figure 3
